# Supplementary material for: Estimation of Forest Parameters in Boreal Artificial Coniferous Forests Using Landsat 8 and Sentinel-2A
Source: MDPI journal article supplement (doi:10.3390/rs15143605), 2023-07-19
Supplement: s1 [file s1]

Table S1. The results of band, vegetation index, texture and forest parameters.

Pearson correlation coefficients and  $R^2$  between CC, S, BA, and AGB and variables derived from L8 and S2A data. The order of variables in the table are bands, vegetation indices, BTE, MTE, and PTE of L8 and S2A. Textures are defined and labeled using window\_direction\_band\_texture features. Correlation is the correlation obtained by the Pearson method, and the value with \_\_\_\_ in the  $R^2$  column is the optimal solution.

| Parameter | Sensor | Variables             | Correlation | $R^2$         |
|-----------|--------|-----------------------|-------------|---------------|
| CC        | L8     | B6                    | −0.57***    | <u>0.3293</u> |
|           |        | EVI <sub>2</sub>      | −0.4***     | 0.0233        |
|           |        | BTE_3_0_B6_mean       | −0.47***    | 0.2214        |
|           |        | MTE_3_B6_mean         | −0.45***    | 0.2020        |
|           |        | PTE_13_90_correlation | 0.35**      | 0.1192        |
|           | S2A    | B11                   | −0.26*      | 0.0659        |
|           |        | RDVI <sub>2</sub>     | −0.54***    | 0.3156        |
|           |        | BTE_13_135_B8_mean    | 0.41***     | 0.1689        |
|           |        | MTE_9_B11_correlation | 0.42***     | 0.1794        |
|           |        | PTE_13_135_mean       | −0.31*      | 0.0973        |
| S         | L8     | B5                    | 0.41***     | 0.1690        |
|           |        | DVI                   | 0.45***     | 0.1991        |
|           |        | BTE_7_0_B3_contrast   | 0.55***     | 0.3042        |
|           |        | MTE_7_B4_contrast     | 0.49***     | 0.2281        |
|           |        | PTE_3_90_variance     | 0.45***     | 0.2033        |
|           | S2A    | B3                    | 0.74***     | 0.5472        |
|           |        | RDVI <sub>2</sub>     | −0.4***     | 0.4003        |
|           |        | BTE_3_0_B2_entropy    | 0.83***     | <u>0.6846</u> |
|           |        | MTE_3_B2_homogeneity  | −0.8***     | 0.6360        |
|           |        | PTE_13_0_correlation  | −0.55***    | 0.2974        |
| BA        | L8     | B6                    | −0.42***    | 0.1791        |
|           |        | DVI                   | −0.41***    | 0.1693        |
|           |        | BTE_3_0_B6_mean       | −0.38**     | 0.1553        |
|           |        | MTE_3_B6_mean         | −0.38**     | 0.1558        |
|           |        | PTE_13_45_correlation | 0.47***     | 0.2189        |
|           | S2A    | B11                   | −0.48***    | 0.2312        |
|           |        | DVI <sub>2</sub>      | −0.48***    | <u>0.2949</u> |
|           |        | BTE_3_0_B11_mean      | −0.48***    | 0.2339        |
|           |        | MTE_3_B11_mean        | −0.46***    | 0.2109        |
|           |        | PTE_13_0_entropy      | 0.28*       | 0.0782        |
| AGB       | L8     | B6                    | −0.48***    | 0.2285        |
|           |        | DVI                   | −0.41***    | 0.1680        |
|           |        | BTE_3_0_B6_mean       | −0.44**     | 0.1899        |
|           |        | MTE_3_B6_mean         | −0.44**     | 0.1953        |
|           |        | PTE_11_45_correlation | 0.45***     | 0.2004        |
|           | S2A    | B11                   | −0.55***    | 0.3054        |
|           |        | DVI <sub>2</sub>      | −0.46***    | <u>0.3199</u> |
|           |        | BTE_3_0_B11_mean      | −0.52***    | 0.2755        |
|           |        | MTE_5_B11_mean        | −0.45***    | 0.1984        |
|           |        | PTE_11_45_correlation | 0.33**      | 0.1079        |

\*\*\* Correlation is significant at the 0.001 level. \*\* Correlation is significant at the 0.01 level. \* Correlation is significant at the 0.05 level.

Table S2. The results of VI and forest parameters.

Summary of the results of the optimal vegetation indices obtained using screening different sensors after adding weights to the bands, and the value with \_\_\_\_ in the  $R^2$  column is the optimal solution.

| Parameter | Sensor | BAND_VI  | $m$ | $R^2$         | RMSE   |
|-----------|--------|----------|-----|---------------|--------|
| CC        | L8     | NDVI5-6  | 0.1 | 0.3420        | 0.4621 |
|           |        | RVI5-6   | 0.9 | 0.3582        | 0.3175 |
|           | S2A    | NDVI12-3 | 0.1 | 0.3523        | 0.0475 |
|           |        | RVI12-3  | 0.3 | <u>0.3639</u> | 0.0460 |
| S         | L8     | NDVI5-6  | 0.1 | 0.4801        | 0.0409 |
|           |        | RVI5-6   | 0.1 | 0.4889        | 0.0305 |
|           | S2A    | NDVI3-11 | 1   | 0.5426        | 0.0379 |
|           |        | RVI3-11  | 0.1 | <u>0.5570</u> | 0.0038 |
| BA        | L8     | NDVI6-5  | 1   | 0.4992        | 0.0602 |
|           |        | RVI6-5   | 0.7 | 0.6298        | 0.0452 |
|           | S2A    | NDVI12-5 | 0.1 | 0.6718        | 0.0097 |
|           |        | RVI12-5  | 0.3 | <u>0.6766</u> | 0.0219 |
| AGB       | L8     | NDVI6-5  | 1   | 0.5288        | 0.0602 |
|           |        | RVI6-5   | 0.3 | 0.6432        | 0.0190 |
|           | S2A    | NDVI12-5 | 0.1 | 0.6942        | 0.0093 |
|           |        | RVI12-5  | 0.7 | <u>0.6987</u> | 0.0489 |

Table S3. The results of CTI and forest parameters.

Summary table of optimal CTI results, and the value with \_\_\_\_ in the  $R^2$  column is the optimal solution.

| Parameter | Sensor | BAND_TI   | $m$ | Size | Angle | Feature       | $R^2$         | RMSE   |
|-----------|--------|-----------|-----|------|-------|---------------|---------------|--------|
| CC        | L8     | NDTI6-5   | 0.1 | 3    | 45    | Mean          | 0.5632        | 0.0111 |
|           |        | RTI6-5    | 0.7 | 3    | 45    | Mean          | <u>0.5800</u> | 0.0479 |
|           | S2A    | NDTI4-3   | 0.3 | 11   | 135   | Correlation   | 0.3161        | 0.2992 |
|           |        | RTI4-3    | 0.7 | 11   | 135   | Correlation   | 0.2663        | 2.6458 |
| S         | L8     | NDTI6-3   | 0.6 | 9    | 45    | Correlation   | 0.3768        | 0.6730 |
|           |        | RTI4-2    | 0.7 | 3    | 45    | Variance      | 0.5207        | 0.4168 |
|           | S2A    | NDTI3-2   | 0.1 | 3    | 0     | Second Moment | 0.6921        | 0.0103 |
|           |        | RTI3-2    | 0.9 | 3    | 0     | Second Moment | <u>0.6937</u> | 0.0535 |
| BA        | L8     | NDTI2-3   | 0.9 | 5    | 135   | Correlation   | 0.2111        | 0.7256 |
|           |        | RTI7-4    | 0.6 | 3    | 45    | Mean          | <u>0.5425</u> | 0.0722 |
|           | S2A    | NDTI12-8A | 0.1 | 3    | 0     | Mean          | 0.4473        | 0.0427 |
|           |        | RTI12-8A  | 0.1 | 3    | 0     | Mean          | 0.2129        | 2.1430 |
| AGB       | L8     | NDTI6-3   | 0.1 | 5    | 135   | Correlation   | <u>0.2628</u> | 1.0329 |
|           |        | RTI5-2    | 0.1 | 5    | 45    | Variance      | 0.2486        | 0.6419 |
|           | S2A    | NDTI4-8   | 0.4 | 3    | 0     | Correlation   | 0.2344        | 2.0048 |
|           |        | RTI6-8A   | 0.9 | 5    | 0     | Variance      | 0.2499        | 0.7172 |

Table S4. The results of MTI and forest parameters.

Summary table of optimal MTI results, and the value with \_\_\_\_ in the  $R^2$  column is the optimal solution.

| Parameter | Sensor | BAND_TI | $m$ | Size | Feature | $R^2$         | RMSE   |
|-----------|--------|---------|-----|------|---------|---------------|--------|
| CC        | L8     | NDTI6-5 | 0.1 | 3    | Mean    | 0.5769        | 0.0112 |
|           |        | RTI6-5  | 0.3 | 3    | Mean    | <u>0.5924</u> | 0.0202 |

|   |     |          |     |    |               |               |        |
|---|-----|----------|-----|----|---------------|---------------|--------|
| S | S2A | NDTI4-3  | 0.1 | 13 | Correlation   | 0.4048        | 0.0960 |
|   |     | RTI6-3   | 0.7 | 9  | Variance      | 0.3132        | 7.4706 |
|   | L8  | NDTI6-2  | 0.1 | 13 | Correlation   | 0.3345        | 0.0474 |
|   |     | RTI6-2   | 0.5 | 13 | Correlation   | 0.3446        | 0.1461 |
|   | S2A | NDTI3-2  | 0.1 | 3  | Second Moment | 0.6367        | 0.0107 |
|   |     | RTI3-11  | 0.9 | 3  | Entropy       | <u>0.6437</u> | 0.0513 |
|   | BA  | NDTI7-4  | 0.1 | 3  | Mean          | 0.6075        | 0.0207 |
|   |     | RTI7-4   | 0.3 | 3  | Mean          | <u>0.6227</u> | 0.0377 |
|   |     | NDTI4-8A | 0.5 | 5  | Correlation   | 0.4726        | 0.4262 |
|   |     | RTI4-3   | 0.7 | 9  | Entropy       | 0.4940        | 1.3407 |
|   | AGB | NDTI7-4  | 0.1 | 3  | Mean          | 0.6080        | 0.0207 |
|   |     | RTI7-4   | 0.7 | 3  | Mean          | <u>0.6233</u> | 0.0941 |
|   | S2A | NDTI5-8  | 0.1 | 3  | Correlation   | 0.4264        | 8.1103 |
|   |     | RTI7-5   | 0.3 | 3  | Contrast      | 0.4915        | 0.5663 |

Table S5. The results of PTI and forest parameters.

Summary of the results of the optimal PTIs. Per1 and Per2 contain the amount of information after principal component analysis for the main and secondary texture features, respectively. And the value with \_\_\_\_ in the  $R^2$  column is the optimal solution.

| Parameter | Sensor | BAND_TI   | $m$ | Size | Angle | Per1(%) | Per2(%) | $R^2$         | RMSE   |
|-----------|--------|-----------|-----|------|-------|---------|---------|---------------|--------|
| CC        | L8     | NDTI6-4   | 0.4 | 5    | 0     | 61.6534 | 57.6852 | 0.3759        | 4.8485 |
|           |        | RTI3-4    | 0.7 | 3    | 135   | 69.2332 | 65.1292 | 0.5159        | 2.8574 |
|           | S2A    | NDTI12-8A | 0.9 | 13   | 90    | 82.0817 | 74.1906 | 0.7000        | 3.5158 |
|           |        | RTI8A-3   | 0.9 | 7    | 135   | 74.6949 | 88.0945 | <u>0.7344</u> | 4.0799 |
| S         | L8     | NDTI3-2   | 0.9 | 7    | 45    | 60.9091 | 63.6910 | 0.5988        | 3.0842 |
|           |        | RTI5-4    | 0.5 | 5    | 45    | 65.6281 | 59.0795 | 0.5493        | 4.1997 |
|           | S2A    | NDTI4-5   | 0.3 | 3    | 0     | 93.6493 | 82.4615 | 0.7230        | 1.4555 |
|           |        | RTI4-8    | 0.1 | 5    | 45    | 92.7594 | 83.2894 | <u>0.7435</u> | 0.0942 |
| BA        | L8     | NDTI7-2   | 0.4 | 5    | 45    | 55.2540 | 62.4738 | 0.4964        | 1.9469 |
|           |        | RTI3-4    | 0.2 | 3    | 135   | 61.5875 | 60.0869 | 0.4261        | 6.2962 |
|           | S2A    | NDTI12-3  | 0.1 | 7    | 135   | 73.2039 | 88.0945 | 0.6430        | 0.3739 |
|           |        | RTI11-3   | 0.5 | 7    | 135   | 67.4230 | 88.0945 | <u>0.6544</u> | 0.8214 |
| AGB       | L8     | NDTI7-2   | 0.1 | 9    | 45    | 60.2844 | 59.5888 | 0.4701        | 1.0054 |
|           |        | RTI7-4    | 0.9 | 5    | 135   | 61.7050 | 63.3313 | 0.4431        | 3.9080 |
|           | S2A    | NDTI11-6  | 0.6 | 9    | 135   | 69.2553 | 75.8701 | 0.6846        | 3.8379 |
|           |        | RTI11-4   | 0.7 | 9    | 90    | 68.1722 | 89.1878 | <u>0.6991</u> | 3.2687 |
